# Supplementary material for: Characterization and disease control potential of biogenic silver nanoparticles against angular leaf spot of cucurbits
Source: Research Square preprint supplement (doi:10.21203/rs.3.rs-8625380/v1), 2026-02-11
Supplement: Supplementary file 1 [file 378c4879146df056280c18c5.docx]

**Table 1 Phytochemical analysis of *L. camara* leaf extract**

| **S.No.** | **Phytoconstituent** | **Reagents/ Test** | **Presence** |
| --- | --- | --- | --- |
| 1. | Alkaloids | Wagner’s reagent | + |
| 2. | Flavonoids | Alkaline reagent | + |
| 3. | Carbohydrates | Benedict’s reagent | - |
| 4. | Saponins | Distilled water (Froth and Foam test) | + |
| 5. | Tannins | Ferric chloride test | + |
| 6. | Resin | Acetone (Solubility test) | + |
| 7. | Oils | Spot Test | + |

**Table 2 FTIR spectral data of *L. camara* leaf extract**

| **S.No.** | **Peak position** | **Functional group** | **Remark** |
| --- | --- | --- | --- |
| 1. | 3339.33 cm-1 | O-H stretching | Alcohols and phenols |
| 2. | 2977.98 cm-1 | C-H stretching | Alkanes |
| 3. | 1644.97 cm-1 | C=C stretching | Alkene |
| 4. | 1383.91 cm-1 | C-H stretching | Alkanes |
| 5. | 1085.61 cm-1 | C-O stretching | Aliphatic ether |
| 6. | 1044.01cm-1 | C-O | Alcohols and phenols |
| 7. | 718.00 cm-1 | C-H out of plane bending | Aromatic compounds |
| 8. | 624.83 cm-1 | C-X stretching | Aromatic compounds |

**Table 3 FTIR spectral data of biogenic nanoparticles**

| **S.No.** | **Peak position** | **Functional group** | **Remark** |
| --- | --- | --- | --- |
| 1. | 3680.32 cm-1 | O-H stretching | Alcohols and phenols |
| 2. | 2922.42 cm-1 | C-H stretching | Alkanes |
| 3. | 1698.83 cm-1 | C=C stretching | Alkene |
| 4. | 1506.08 cm-1 | C-H stretching | Alkanes |
| 5. | 1378.28 cm-1 | C-H stretching | Alkanes |
| 6. | 1251.20 cm-1 | C-N stretching | Amines |
| 7. | 1055.75 cm-1 | C-O, C-O-C | Flavonoids |
| 8. | 1033.08 cm-1 | C-O | Alcohols and phenols |
| 9. | 1015.95 cm-1 | C-O | Alcohols and phenols |
| 10. | 810.85 cm-1 | C-H bending | Aromatic compounds |
| 11. | 560.31 cm-1 | Ag-O stretching | Silver biomolecule interaction |

**Table 4 Weight% and atomic% of biogenic silver nanoparticles**

| **S. No.** | **Elements** | **Weight %** | **Atomic %** |
| --- | --- | --- | --- |
| 1. | B | 0 | 0 |
| 2. | C | 40.08 | 71.71 |
| 3. | N | 1.87 | 2.88 |
| 4. | O | 10.04 | 13.49 |
| 5. | Na | 0.1 | 0.09 |
| 6. | Mg | 0.12 | 0.11 |
| 7. | P | 0 | 0 |
| 8. | S | 0.23 | 0.15 |
| 9. | Cl | 4.15 | 2.52 |
| 10. | K | 0.38 | 0.21 |
| 11. | Ca | 0.8 | 0.43 |
| 12. | Ag | 42.22 | 8.41 |
| **Total** | | **100** | **100** |

**Table 5 PDI after pre-treatment and post- inoculation treatment of biogenic**

**nanoparticles and copper oxychloride**

| **Treatments** | **Pre-treatment** | | **Post inoculation treatment** | |
| --- | --- | --- | --- | --- |
| **PDI** | **Std Error** | **PDI** | **Std Error** |
| T0 (Control) | 95.83(83.09) | 4.17(6.91) | 87.50(73.09) | 7.22(8.88) |
| T1 | 70.83(58.07) | 11.02(7.07) | 66.67(54.80) | 4.17(2.58) |
| T2 | 33.33(35.16) | 4.17(2.59) | 37.50(37.57) | 7.22(4.33) |
| T3 | 45.83(41.89) | 18.16(11.44) | 50.00(44.98) | 14.43(8.66) |
| T4 | 29.17(32.57) | 4.17(2.59) | 54.17(47.39) | 15.02(8.99) |
| T5 | 54.17(47.39) | 15.02(8.99) | 45.84(42.57) | 8.33(4.83) |
| T6 | 50.00(45.16) | 12.50(7.41) | 41.67(40.16) | 4.17(2.41) |

CD (0.05) =22.5, SE (d)=10.39 (Pre-treatment)*; CD (0.05) =19.68, SE(d)=9.09 * (Post inoculation treatment). All the experiments were performed in triplicates. Values in parenthesis are angular transformed values.
